# Supplementary material for: Enzymatic synthesis of biobased aliphatic–aromatic oligoesters using 5,5′-bis(hydroxymethyl)furoin as a building block
Source: Royal Society of Chemistry journal article supplement (doi:10.1039/c9ra06621g), 2019-01-01
Supplement: c9ra06621g1.pdf [file c9ra06621g1.pdf]

## Supplementary information

### **Enzymatic Synthesis of biobased Aliphatic-Aromatic Oligoesters Using 5,5'- Bis(hydroxymethyl)furoin as Building Block**

Serena Baraldi,<sup>1</sup> Giancarlo Fantin,<sup>1</sup> Graziano Di Carmine,<sup>1</sup> Daniele Ragno,<sup>1</sup> Arianna Brandolese,<sup>1</sup>  
Alessandro Massi,<sup>1</sup> Olga Bortolini,<sup>1</sup> Nicola Marchetti,<sup>1</sup> and Pier Paolo Giovannini\*<sup>1</sup>

<sup>1</sup>Department of Chemical and Pharmaceutical Sciences, University of Ferrara, Via L. Borsari, 46  
44121 Ferrara (Italy)

e-mail: [pierpaolo.giovannini@unife.it](mailto:pierpaolo.giovannini@unife.it)

## Table of contents

### NMR spectra

|                                                                                                   |    |
|---------------------------------------------------------------------------------------------------|----|
| <sup>1</sup> H NMR of the mixture of esters <b>1</b> , <b>2</b> and <b>3</b> after chromatography | S1 |
| <sup>1</sup> H NMR of the reaction mixture after 1.5 h at 80 °C (760 mm Hg)                       | S2 |
| <sup>1</sup> H NMR 2D COSY of the reaction mixture after 6 h at 80 °C (3h, 760 and 3h 300 mm Hg)  | S3 |
| <sup>1</sup> H NMR of the reaction mixture after 6 h at 50 °C and 4 h at 60 °C (at 18 mm Hg)      | S4 |
| <sup>1</sup> H NMR of the oligomers obtained from the reaction of DHMF with diethyl succinate     | S5 |
| <sup>13</sup> C NMR of the oligomers obtained from the reaction of DHMF with diethyl succinate    | S6 |
| <sup>1</sup> H NMR of the mixture of esters <b>6</b> , <b>7</b> and <b>8</b> after chromatography | S7 |
| <sup>1</sup> H NMR of the oligomers obtained from the reaction of DHMF with diethyl sebacate      | S8 |
| <sup>13</sup> C NMR of the oligomers obtained from the reaction of DHMF with diethyl sebacate     | S9 |

### HPLC-MS chromatograms

|                                                                                    |     |
|------------------------------------------------------------------------------------|-----|
| HPLC-MS of the mixture of products <b>1</b> , <b>2</b> and <b>3</b>                | S10 |
| HPLC-MS of byproduct <b>5</b>                                                      | S11 |
| HPLC-MS of the oligomers mixture obtained from the reaction with diethyl succinate | S12 |
| HPLC-MS of the mixture of products <b>6</b> , <b>7</b> and <b>8</b>                | S13 |
| HPLC-MS of the oligomers mixture obtained from the reaction with diethyl sebacate  | S14 |

S1

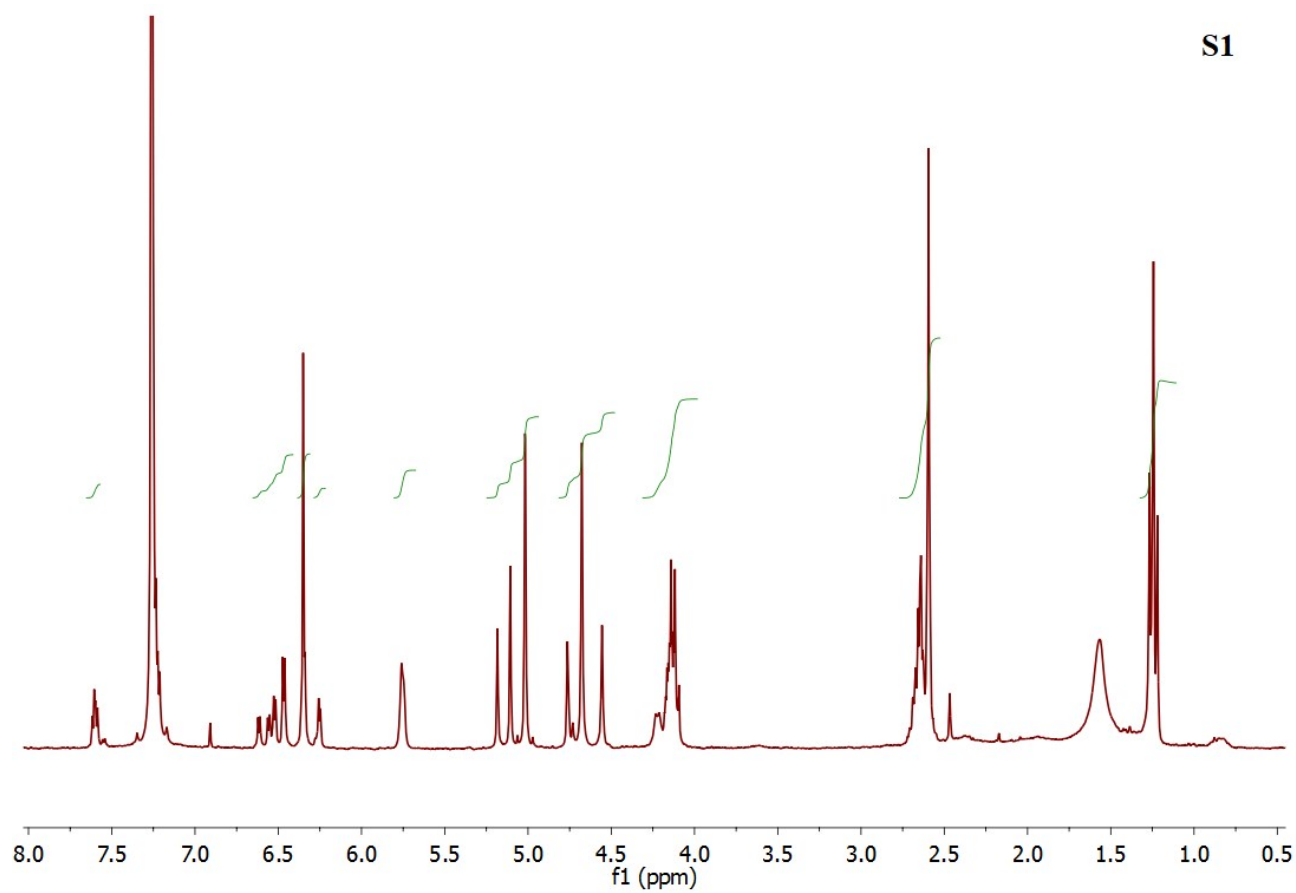

$^1\text{H}$  NMR of the mixture of esters **1**, **2** and **3** after chromatography

S2

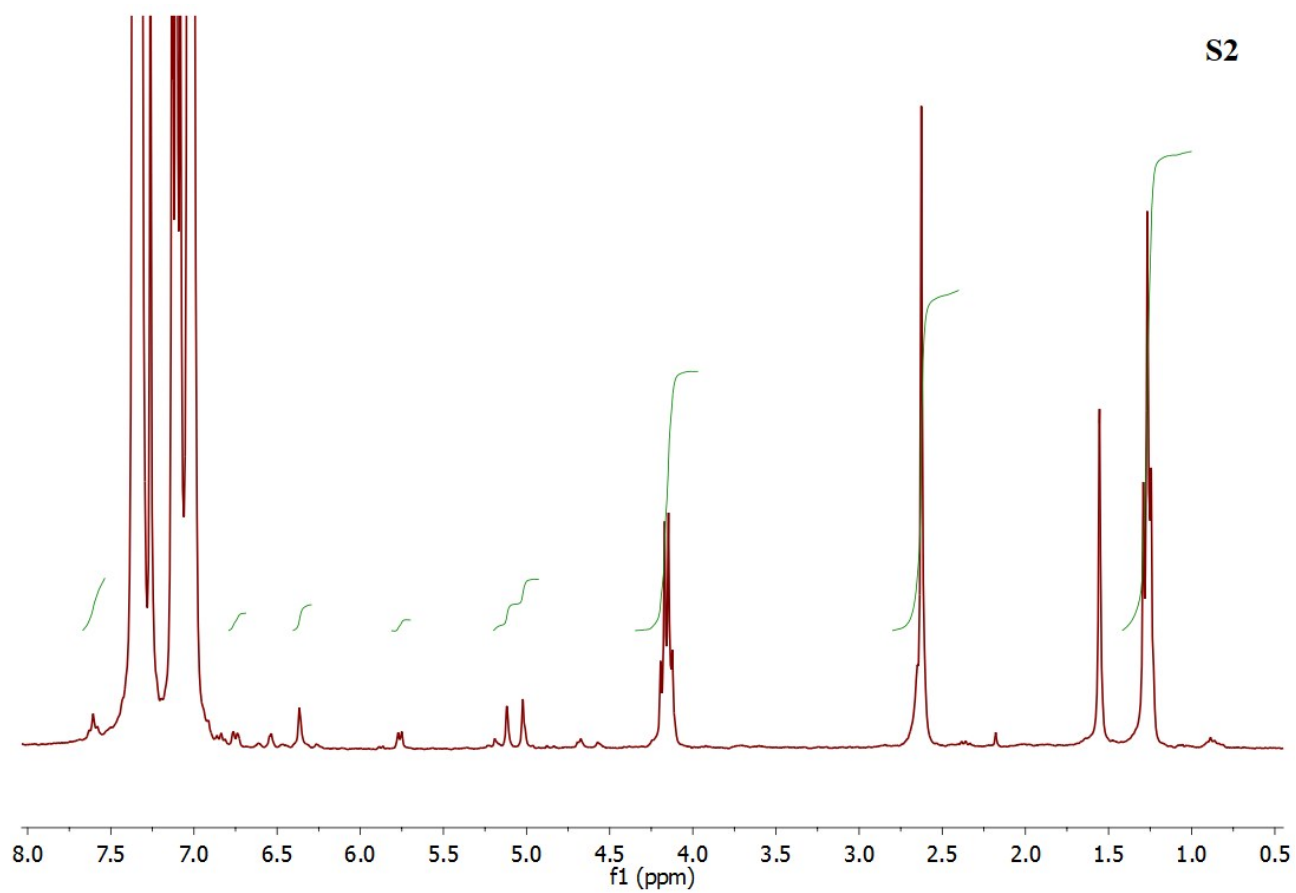

$^1\text{H}$  NMR of the reaction mixture after 1.5 h at 80 °C (760 mm Hg)

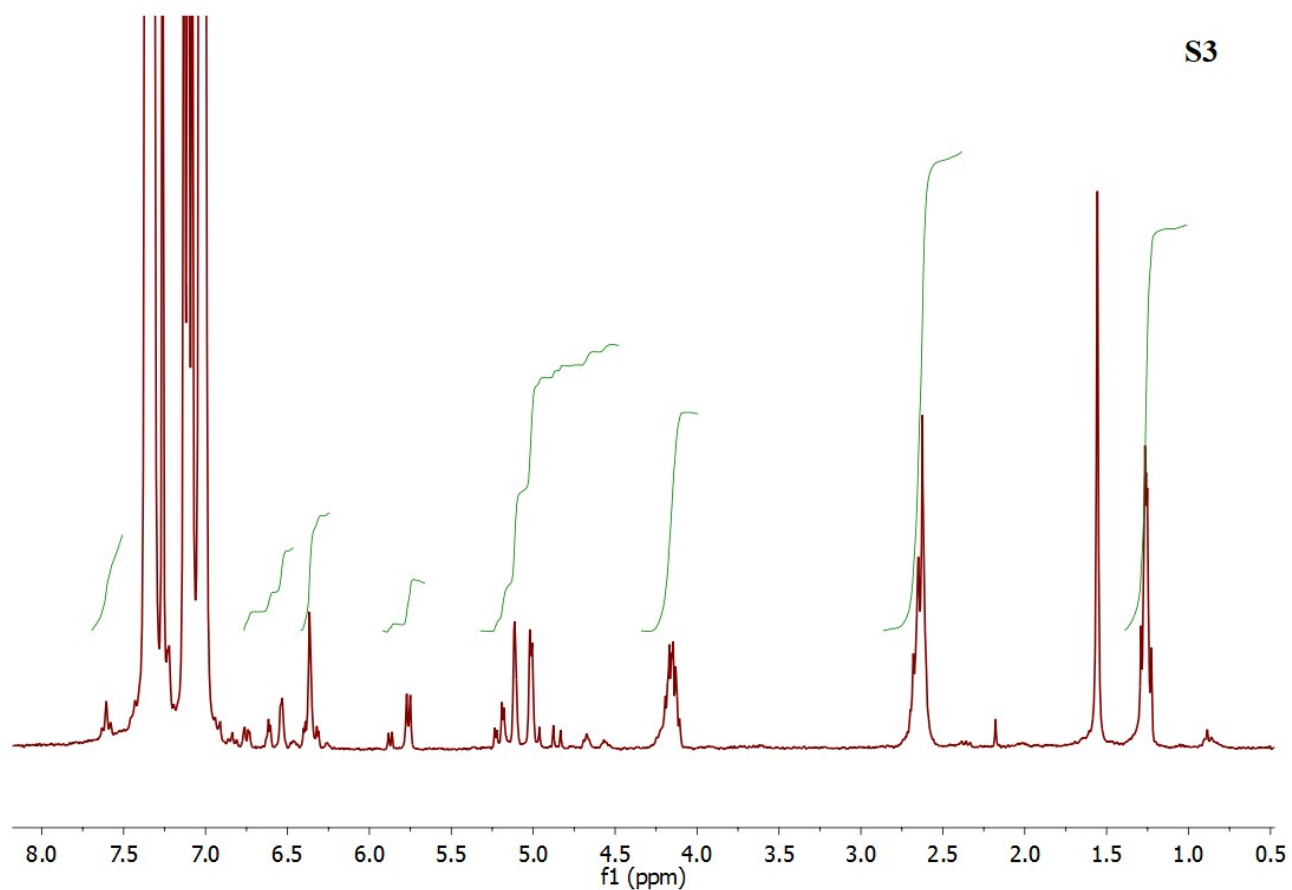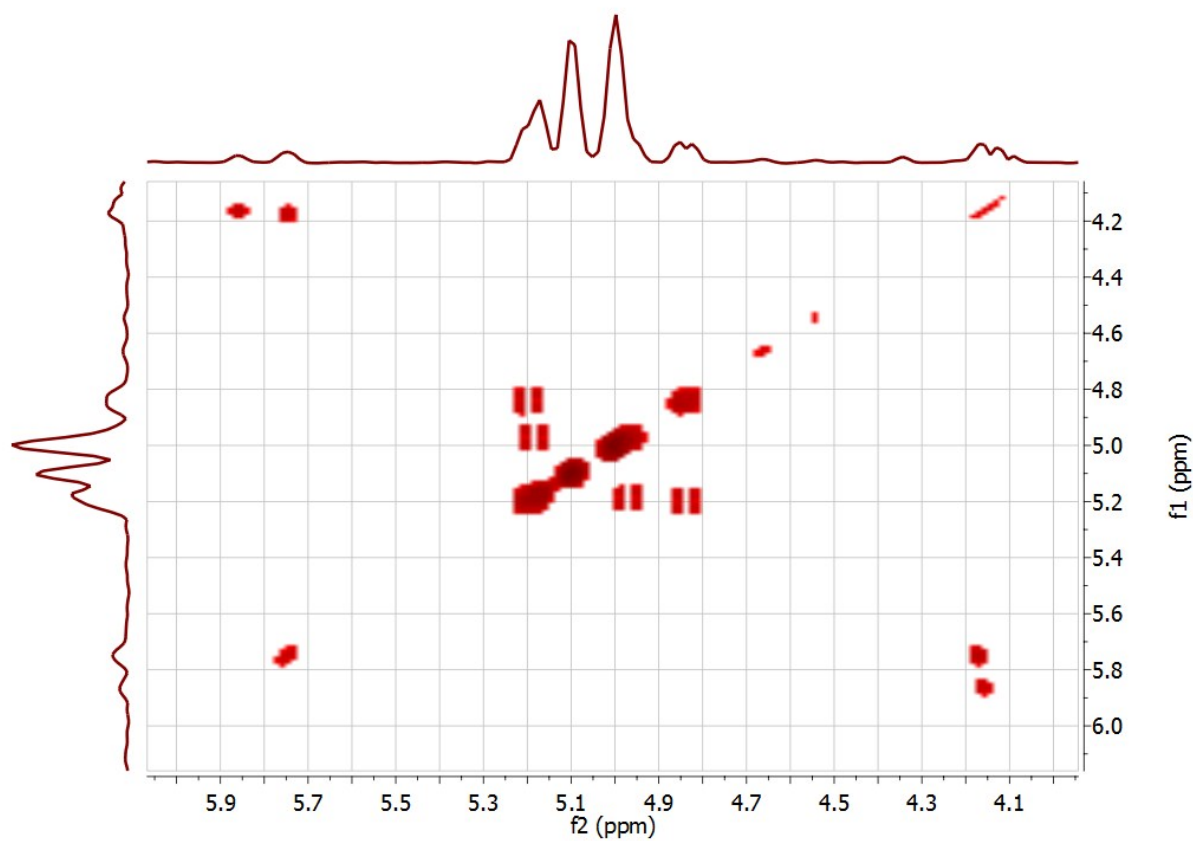

<sup>1</sup>H NMR and 2D COSY of the reaction mixture after 6 h at 80 °C (3h at 760 and 3h at 300 mm Hg)

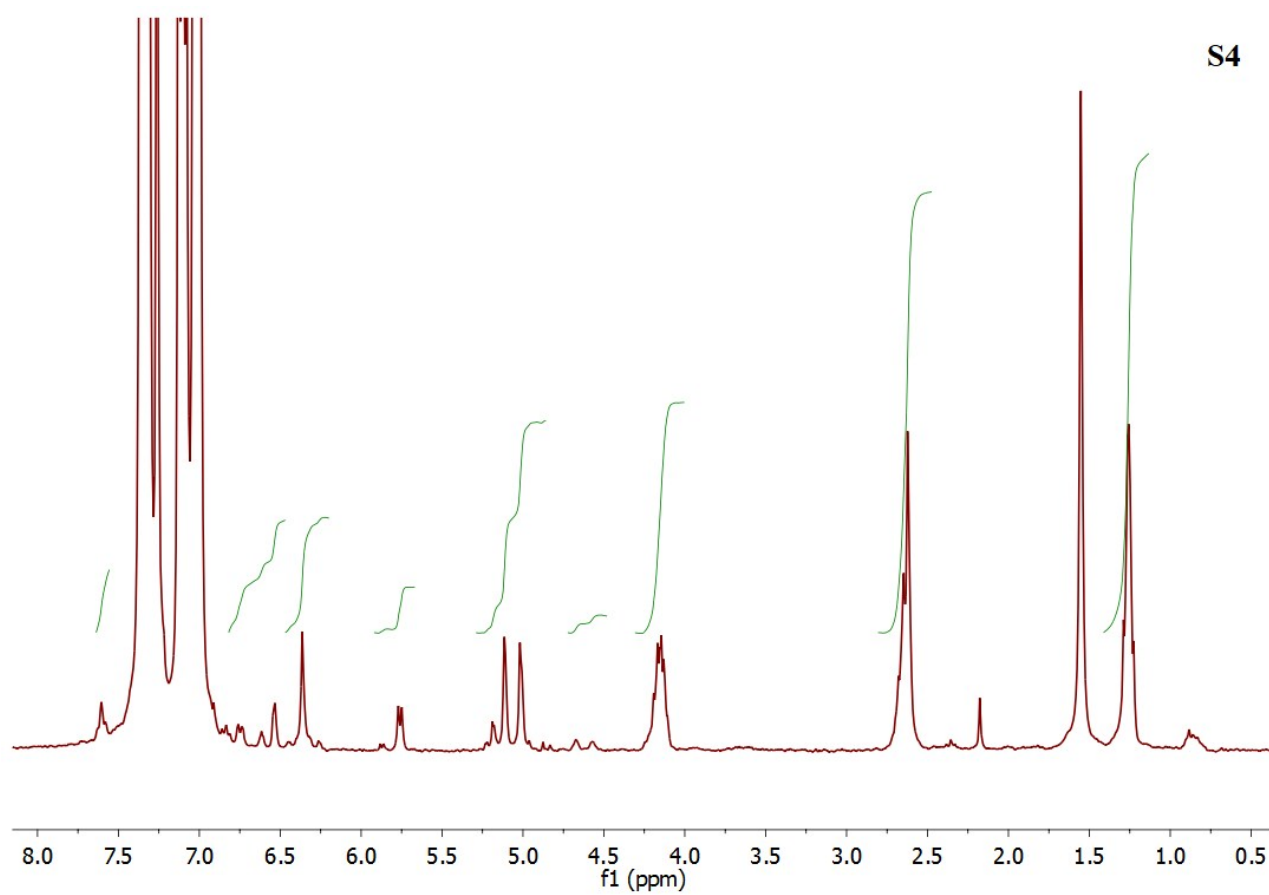

$^1\text{H}$  NMR of the reaction mixture after 6 h at 50 °C and 4 h at 60 °C (at 18 mm Hg)

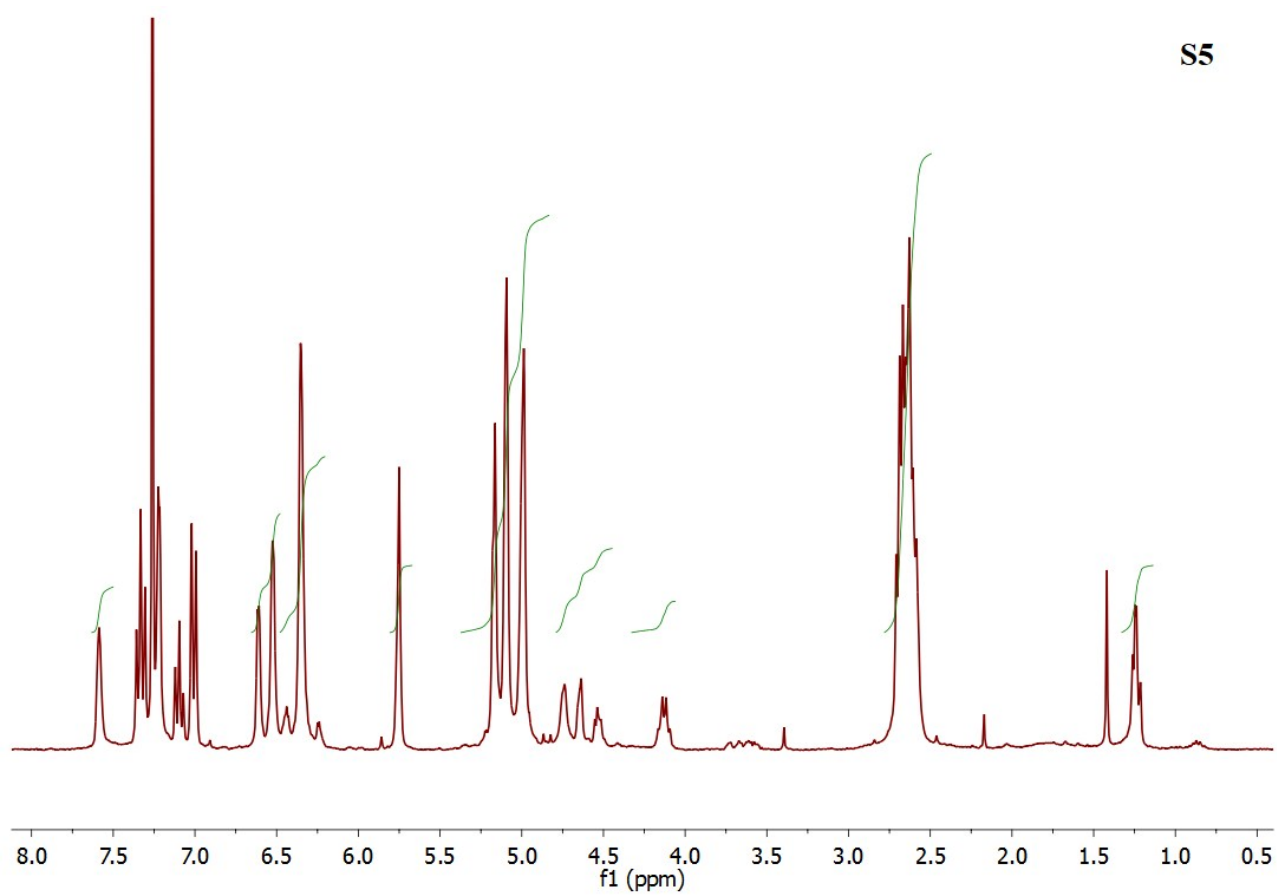

$^1\text{H}$  NMR of the oligomers obtained from the reaction of DHMF with diethyl succinate

S6

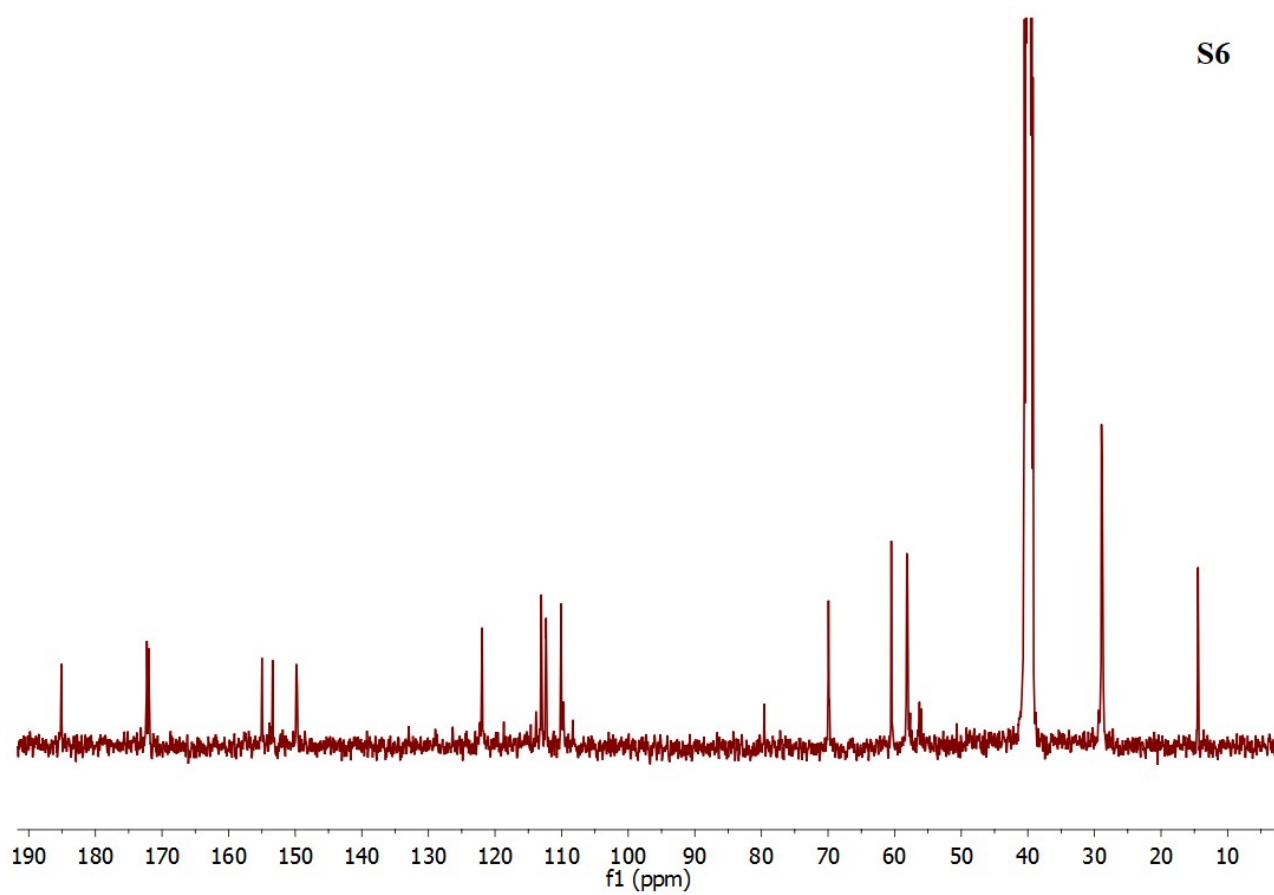

$^{13}\text{C}$  NMR of the oligomers obtained from the reaction of DHMF with diethyl succinate



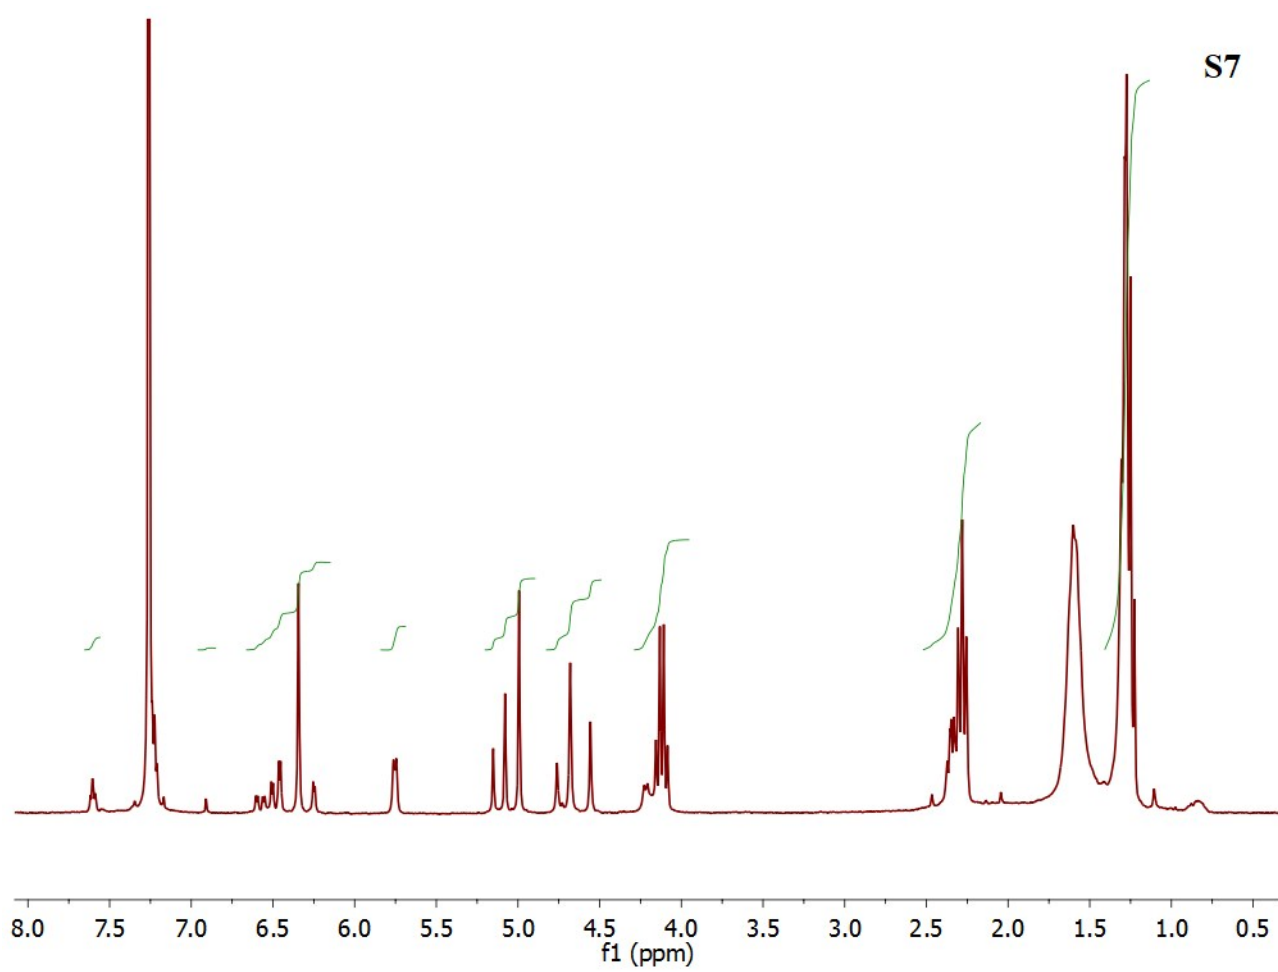

$^1\text{H}$  NMR of the mixture of esters **6**, **7** and **8** after chromatography

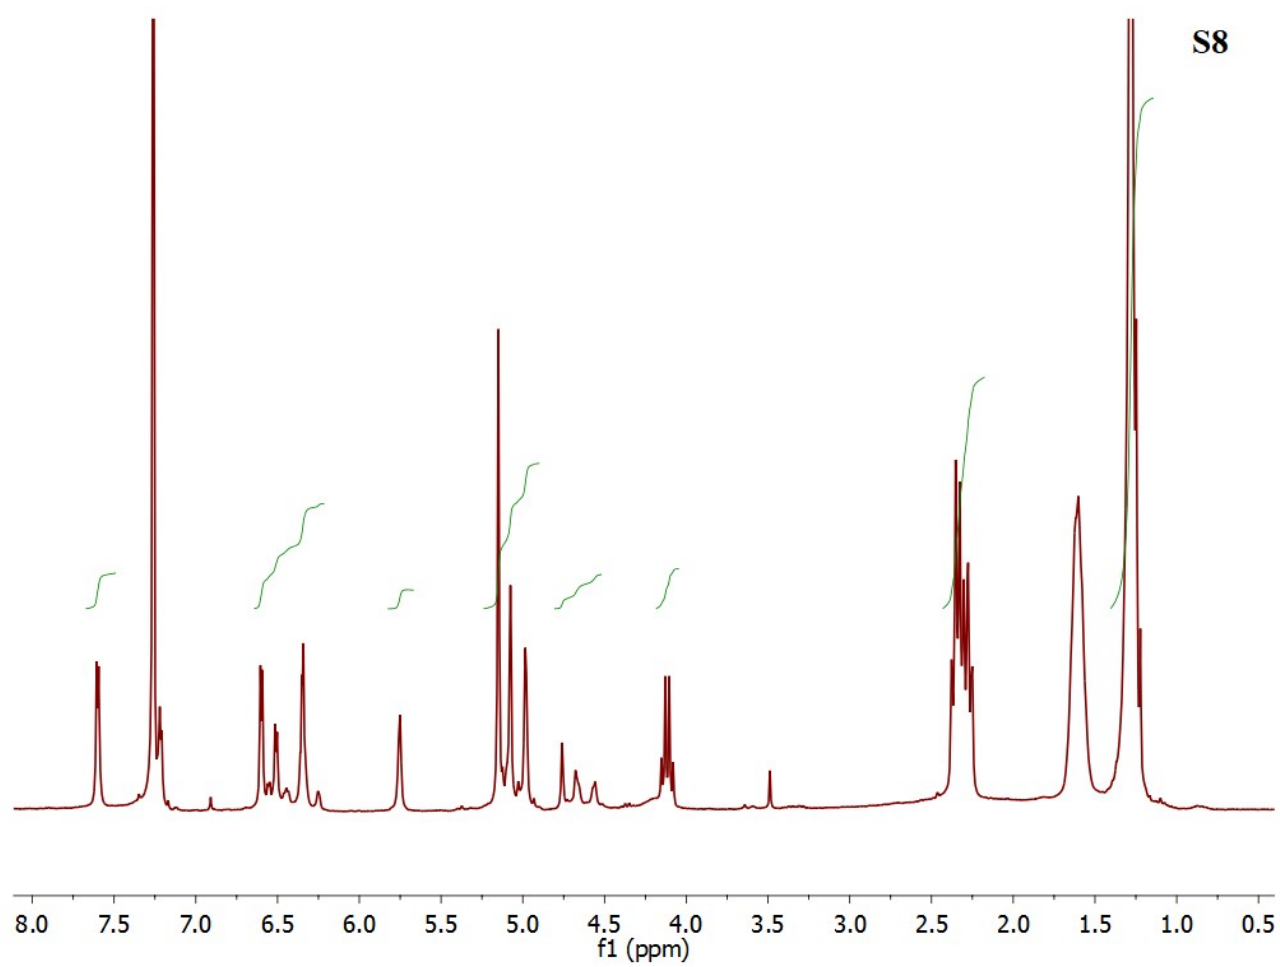

$^1\text{H}$  NMR of the oligomers obtained from the reaction of DHMF with diethyl sebacate

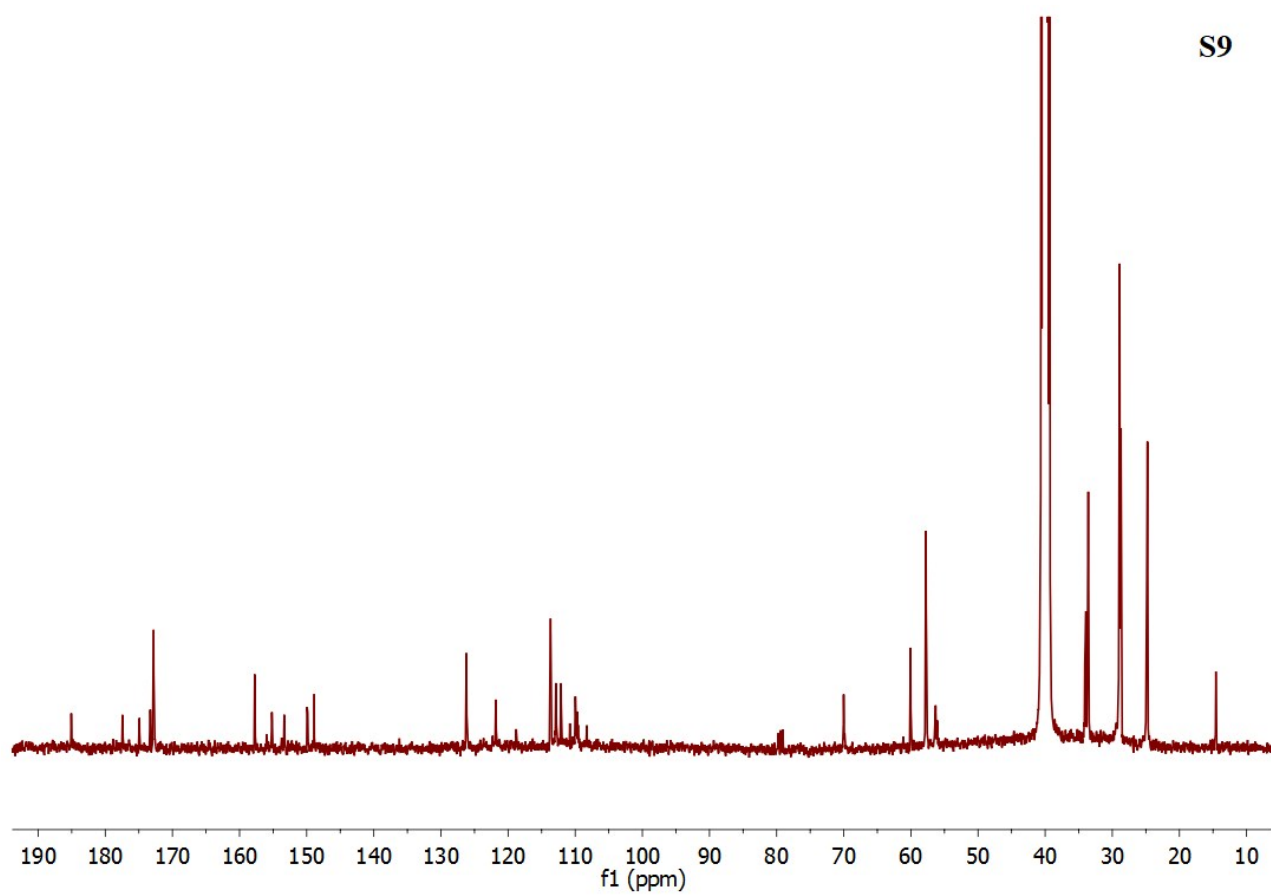

$^{13}\text{C}$  NMR of the oligomers obtained from the reaction of DHMF with diethyl sebacate

# **S10**

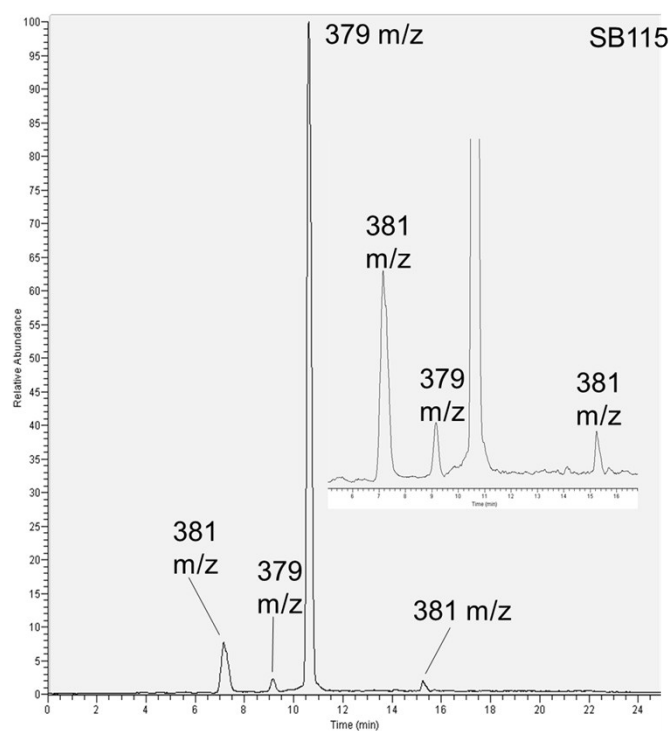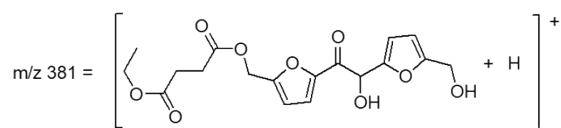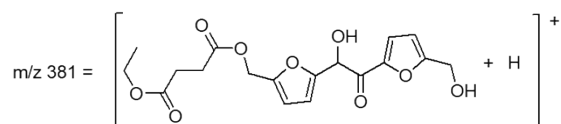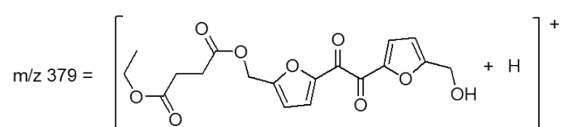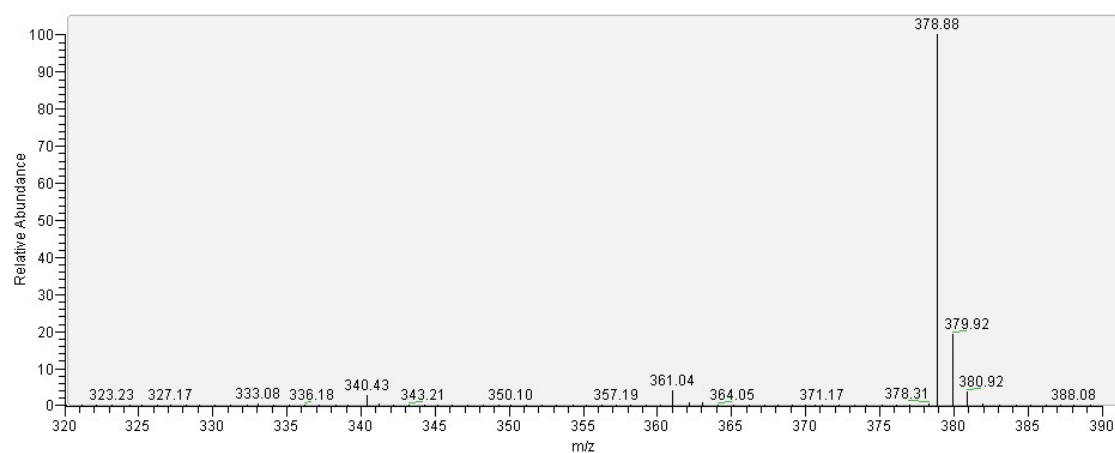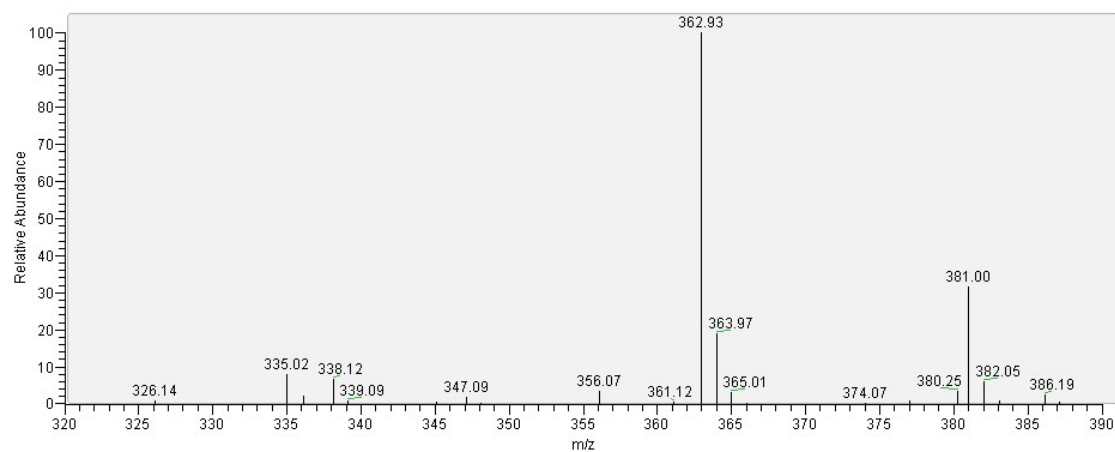

HPLC-MS of the mixture of products **1**, **2** and **3**

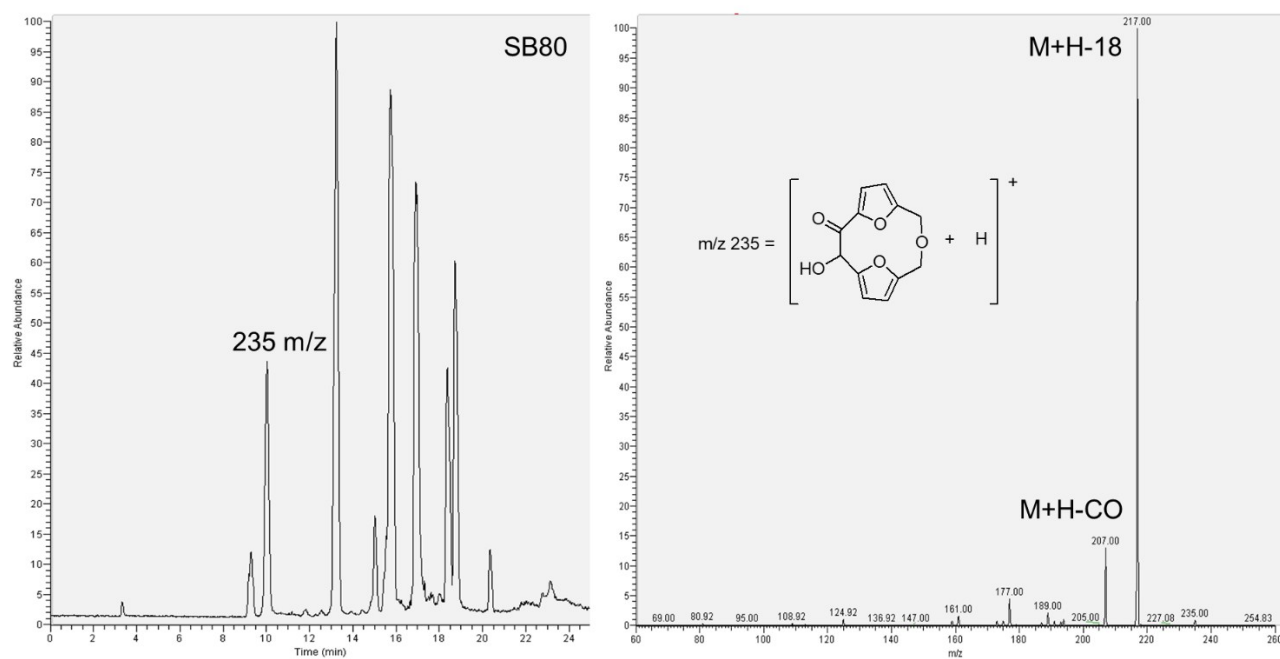HPLC-MS of byproduct **5**

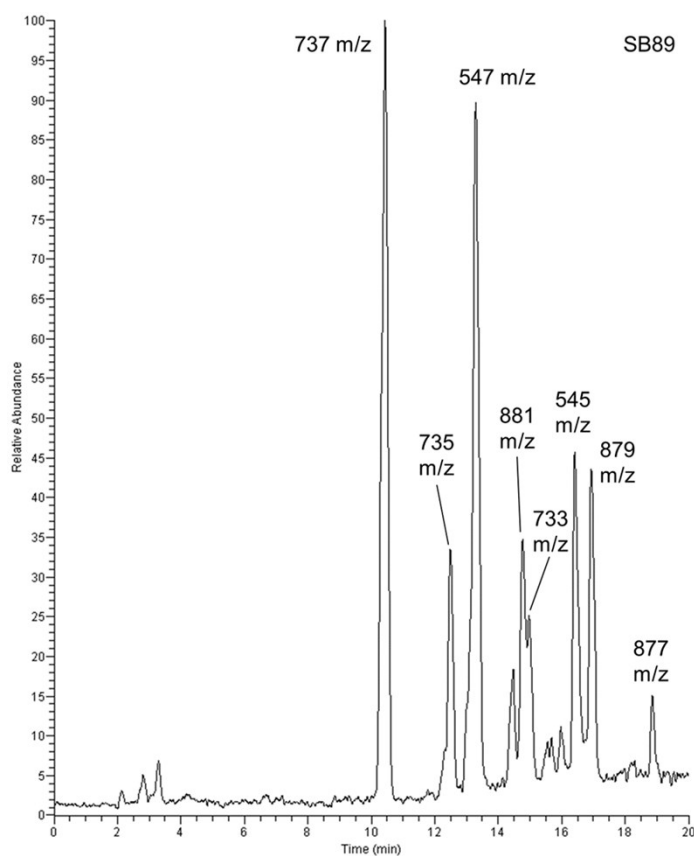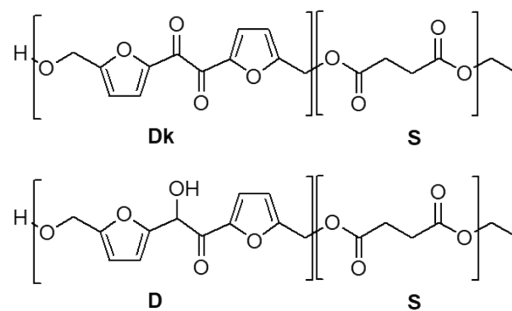

$$m/z\ 545 = [\text{Et-S-Dk-S-Et} + \text{Na}]^+$$

$$m/z\ 547 = [\text{Et-S-D-S-Et} + \text{Na}]^+$$

$$m/z\ 733 = [\text{H-Dk-S-Dk-S-Et} + \text{Na}]^+$$

$$m/z\ 735 = [\text{H-D-S-Dk-S-Et} + \text{Na}]^+$$

$$m/z\ 737 = [\text{H-D-S-D-S-Et} + \text{Na}]^+$$

$$m/z\ 877 = [\text{Et-S-Dk-S-Dk-S-Et} + \text{Na}]^+$$

$$m/z\ 879 = [\text{Et-S-D-S-Dk-S-Et} + \text{Na}]^+$$

$$m/z\ 881 = [\text{Et-S-D-S-D-S-Et} + \text{Na}]^+$$

HPLC-MS of the oligomers mixture obtained from the reaction with diethyl succinate

# S13

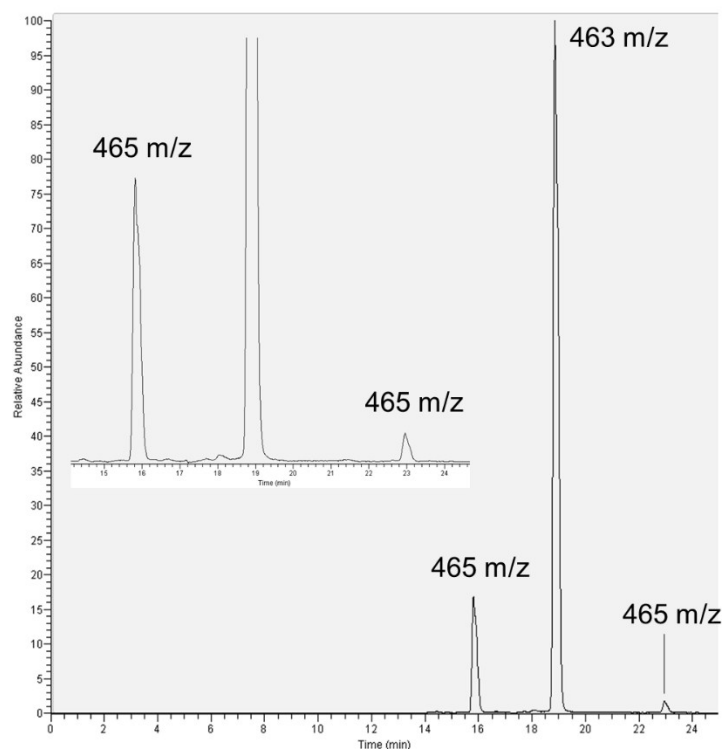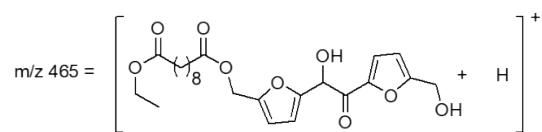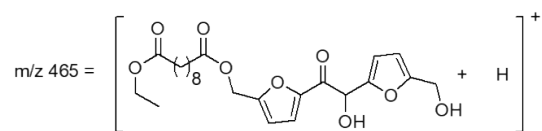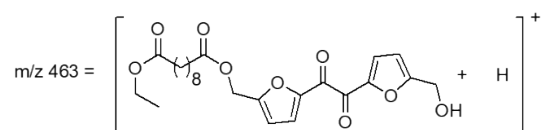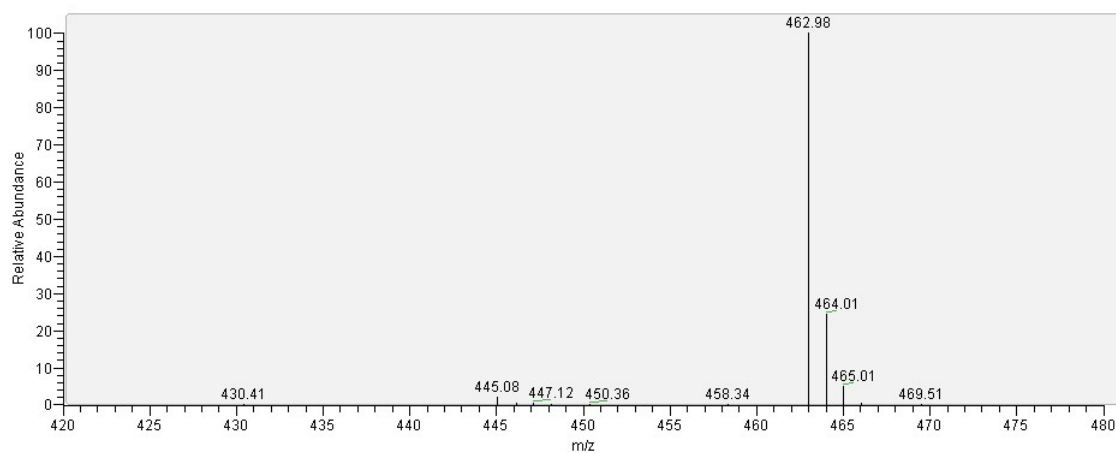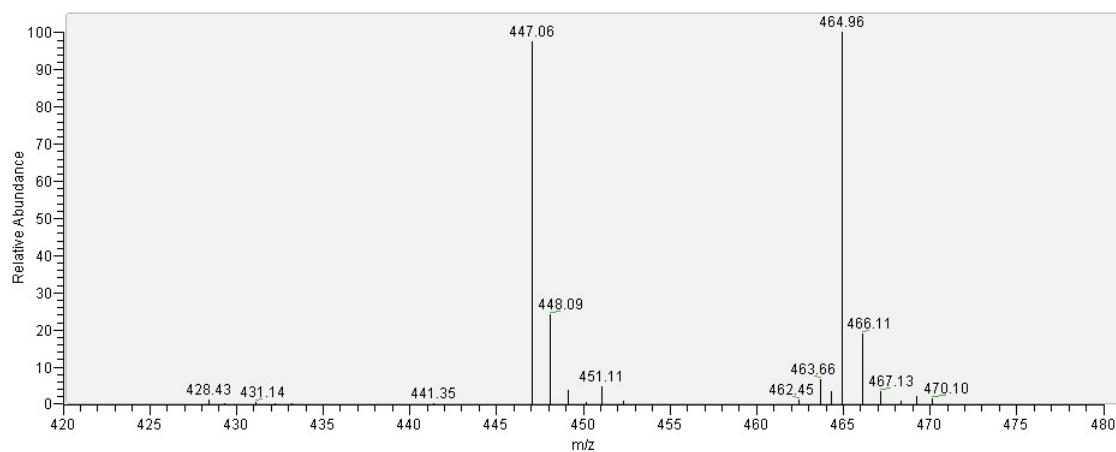

HPLC-MS of the mixture of products **6**, **7** and **8**

# S14

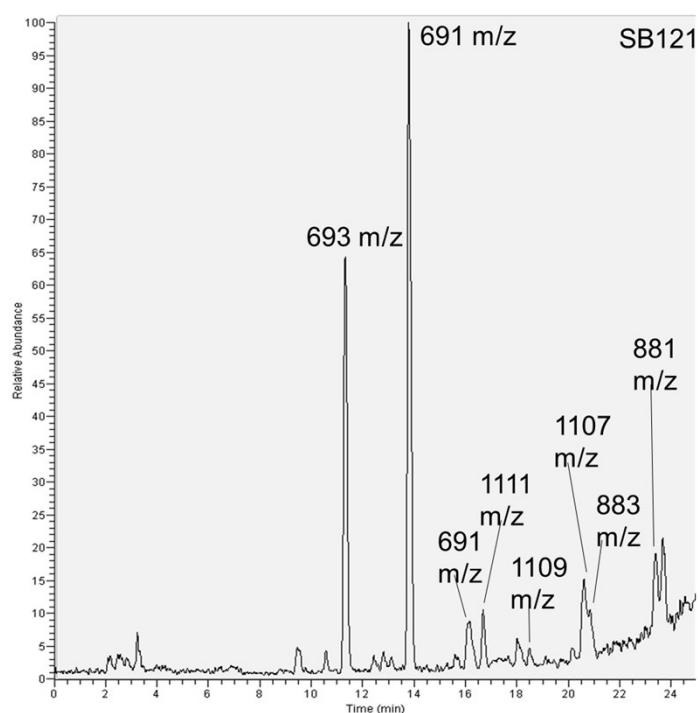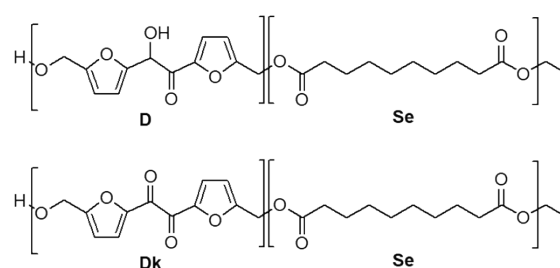

- $m/z\ 691 = [\text{Et-Se-Dk-Se-Et} + \text{H}]^+$
- $m/z\ 693 = [\text{Et-Se-D-Se-Et} + \text{H}]^+$
- $m/z\ 881 = [\text{H-D-Se-Dk-Se-Et} + \text{H}]^+$
- $m/z\ 883 = [\text{H-D-Se-D-Se-Et} + \text{H}]^+$
- $m/z\ 1107 = [\text{Et-Se-Dk-Se-Dk-Se-Et} + \text{H}]^+$
- $m/z\ 1109 = [\text{Et-Se-Dk-Se-D-Se-Et} + \text{H}]^+$
- $m/z\ 1111 = [\text{Et-Se-D-Se-D-S-Et} + \text{H}]^+$

HPLC-MS of the oligomers mixture obtained from the reaction with diethyl sebacate
